# Supplementary material for: Theoretical challenges in understanding the inhibition mechanism of copper corrosion in acid media in the presence of three triazole derivatives
Source: Royal Society of Chemistry journal article supplement (doi:10.1039/c4ra04931d), 2014-01-01
Supplement: c4ra04931d1.pdf [file c4ra04931d1.pdf]

## Supporting Information

Some solids and molecular systems were investigated using DMol<sup>3</sup>/GGA-PW91-OBS ( $\lambda = 3.0 \times 10^{-5}$ ,  $n = 8.0$ ). The results are presented in Table S1~S2. They are compared with other theoretical data and available experimental findings. These survey results indicate that the proposed calculation parameter is acceptable.

**Table S1** Calculated lattice constant  $a_0$  for Al, Cu, and Fe crystals.

|           |       | Al                                                                                | Cu                                                                                 | Fe                                                                                  |
|-----------|-------|-----------------------------------------------------------------------------------|------------------------------------------------------------------------------------|-------------------------------------------------------------------------------------|
| structure |       | 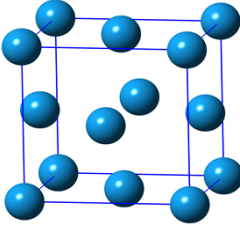 |  |  |
| $a_0$ (Å) | calc. | 4.042                                                                             | 3.645                                                                              | 2.846                                                                               |
|           | expt. | 4.049 <sup>a</sup>                                                                | 3.614 <sup>b</sup>                                                                 | 2.866 <sup>c</sup>                                                                  |

<sup>a</sup> Ref. [1].

<sup>b</sup> Ref. [2].

<sup>c</sup> Ref. [3].

**Table S2** Equilibrium distances  $d$  and binding energies  $E$  for neon, argon, benzene dimers, and benzene@Cu(111).

|           |       | rare-gas                                                                            |                                                                                     | benzene dimers                                                                      |                                                                                      | benzene@Cu(111)                                                                       |
|-----------|-------|-------------------------------------------------------------------------------------|-------------------------------------------------------------------------------------|-------------------------------------------------------------------------------------|--------------------------------------------------------------------------------------|---------------------------------------------------------------------------------------|
|           |       | Ne <sub>2</sub>                                                                     | Ar <sub>2</sub>                                                                     | T-shaped                                                                            | sandwich                                                                             |                                                                                       |
| structure |       | 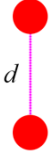 |  |  |  |  |
| $d$ (Å)   | calc. | 3.010                                                                               | 3.812                                                                               | 5.078                                                                               | 4.025 (3.900 <sup>e</sup> )                                                          | 3.250                                                                                 |
|           | expt. | 3.094 <sup>a</sup>                                                                  | 3.761 <sup>b</sup>                                                                  | 4.960 <sup>d</sup>                                                                  |                                                                                      |                                                                                       |
| $E$ (eV)  | calc. | 0.013 (0.016 <sup>c</sup> )                                                         | 0.012                                                                               | 0.123 (0.119 <sup>e</sup> )                                                         | 0.084 (0.079 <sup>e</sup> )                                                          | 0.520                                                                                 |
|           | expt. | 0.007 <sup>a</sup>                                                                  | 0.024 <sup>b</sup>                                                                  |                                                                                     |                                                                                      | 0.600 <sup>f</sup>                                                                    |

<sup>a</sup> Ref. [4].

<sup>b</sup> Ref. [5].

<sup>c</sup> Ref. [6].

<sup>d</sup> Ref. [7].

<sup>e</sup> Ref. [8].

<sup>f</sup> Ref. [9, 10].

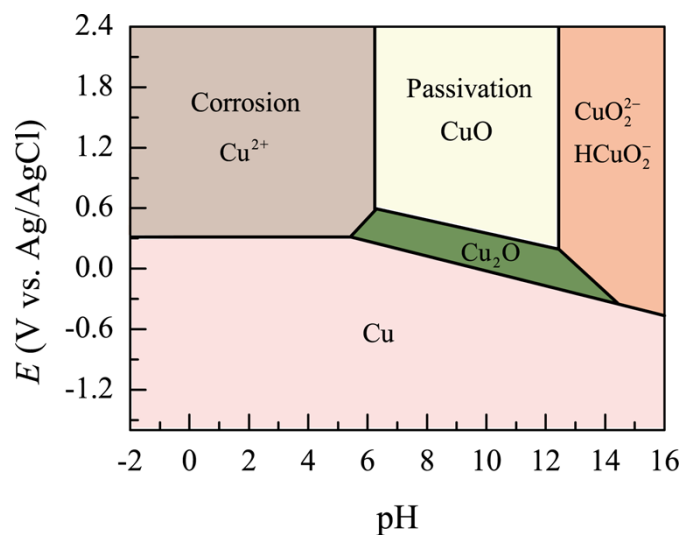

Fig. S Potential-pH equilibrium diagram for the system, copper–water, at 298 K.<sup>11</sup>

### References

- 1 S. Nenno and J. W. Kauffman, *J. Phys. Soc. Jpn.*, 1960, **15**, 220-226.
- 2 S. C. Ng, Brockhou.Bn and E. D. Hallman, *Mater. Res. Bull.*, 1967, **2**, 69-73.
- 3 S. Ohara, S. Komura and T. Takeda, *J. Phys. Soc. Jpn.*, 1973, **34**, 1472-1476.
- 4 A. Wuest and F. Merkt, *J. Chem. Phys.*, 2003, **118**, 8807-8812.
- 5 P. R. Herman, P. E. Larocque and B. P. Stoicheff, *J. Chem. Phys.*, 1988, **89**, 4535-4549.
- 6 Q. Wu and W. T. Yang, *J. Chem. Phys.*, 2002, **116**, 515-524.
- 7 E. Arunan and H. S. Gutowsky, *J. Chem. Phys.*, 1993, **98**, 4294-4296.
- 8 M. O. Sinnokrot and C. D. Sherrill, *J. Phys. Chem. A*, 2004, **108**, 10200-10207.
- 9 P. S. Bagus, K. Hermann and C. Woll, *J. Chem. Phys.*, 2005, **123**.
- 10 A. Kokalj and S. Peljhan, *Langmuir*, 2010, **26**, 14582-14593.
- 11 M. Pourbaix, *Atlas of Electrochemical Equilibria in Aqueous Solutions*, NACE, Houston, TX, 1975.
